# Supplementary material
Source: Springer Nature journal article supplement (https://www.springermedizin.de/resource/supplementary/13223_2013_491_MOESM9_ESM.pdf/9596628)
Supplement: MOESM9 [file 9596628]

| Donors                         | Variation of mitochondrial membrane potential |                   | Translocation of phosphatidylserine |                   |
|--------------------------------|-----------------------------------------------|-------------------|-------------------------------------|-------------------|
|                                | Without dexametasone                          | With dexametasone | Without dexametasone                | With dexametasone |
| Clinically healthy donors      | <p>M1<br/>21%</p>                             | <p>M1<br/>20%</p> | <p>M1<br/>18%</p>                   | <p>M1<br/>24%</p> |
| Asthmatic with mild severity   | <p>M1<br/>20%</p>                             | <p>M1<br/>36%</p> | <p>M2<br/>21%</p>                   | <p>M1<br/>36%</p> |
| Asthmatic with severe severity | <p>M1<br/>27%</p>                             | <p>M1<br/>39%</p> | <p>M2<br/>26%</p>                   | <p>M2<br/>39%</p> |
